## ERRATUM

*Zill, S. N. and Moran, D. T.* The exoskeleton and insect proprioception. Vol. 94, pp. 57-75

On p. 57 the *sub-title* should read 'III. Activity of tibial campaniform . . .' and *not* 'III. Activity of tribal campaniform . ..'. This was the result of a printer's error.
